# Supplementary material
Source: publisher site journal article supplement (https://www.dovepress.com/article/316599)
Supplement: Supplementary file 1 [file get_supplementary_file.php]

## Supplementary tables

**Table S1. Sequence of siRNAs or qPCR primers used in this study.**

| Name                      | Sequence (5'-3')          |                           |
|---------------------------|---------------------------|---------------------------|
|                           | Forward (5'-3')           | Reverse (5'-3')           |
| BCLAF1<br>-siRNA          | GCAGAGGGCGCUUUAACUUTT     | AAGUUAAGCGCCCUCUGCTT      |
| CDK1<br>(human)           | GGAAGGGGTTCCTAGTACTGC     | TGGAATCCTGCATAAGCACA      |
| CCNB1<br>(human)          | ACCAAATACCTACTGGGTCGG     | GCATGAACCGATCAATAATGG     |
| $\beta$ -actin<br>(human) | CACCACACCTTCTACAATGAGCTGC | ACAGCCTGGATAGCAACGTACATGG |

**Table S2. Antibodies used in this study.**

| Name           | Species | Manufacturer   | Product Code       | Application in this study |
|----------------|---------|----------------|--------------------|---------------------------|
| Bclaf1         | human   | Proteintech    | 26809-1-AP         | WB                        |
| CDK1           | human   | Abcam          | ab133327           | WB, IHC                   |
| Cyclin B1      | human   | Abcam          | ab32053            | WB, IHC                   |
| $\beta$ -actin | human   | Ray<br>biotech | antibody<br>RM2001 | WB                        |

Supplementary figure

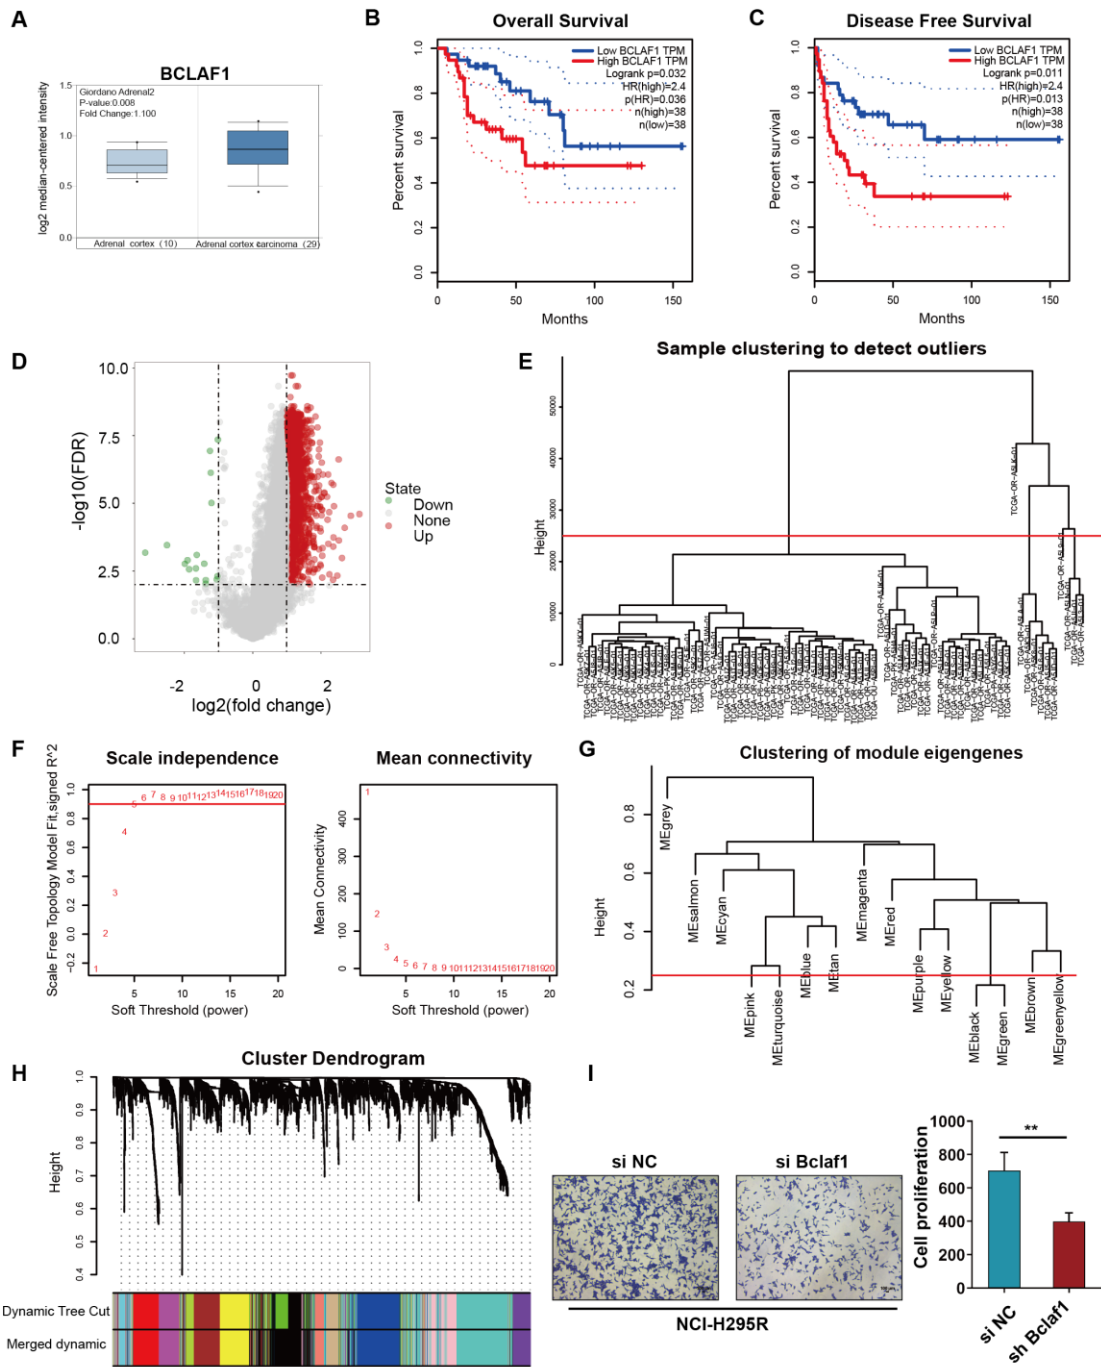

[316599]Figure S[1]

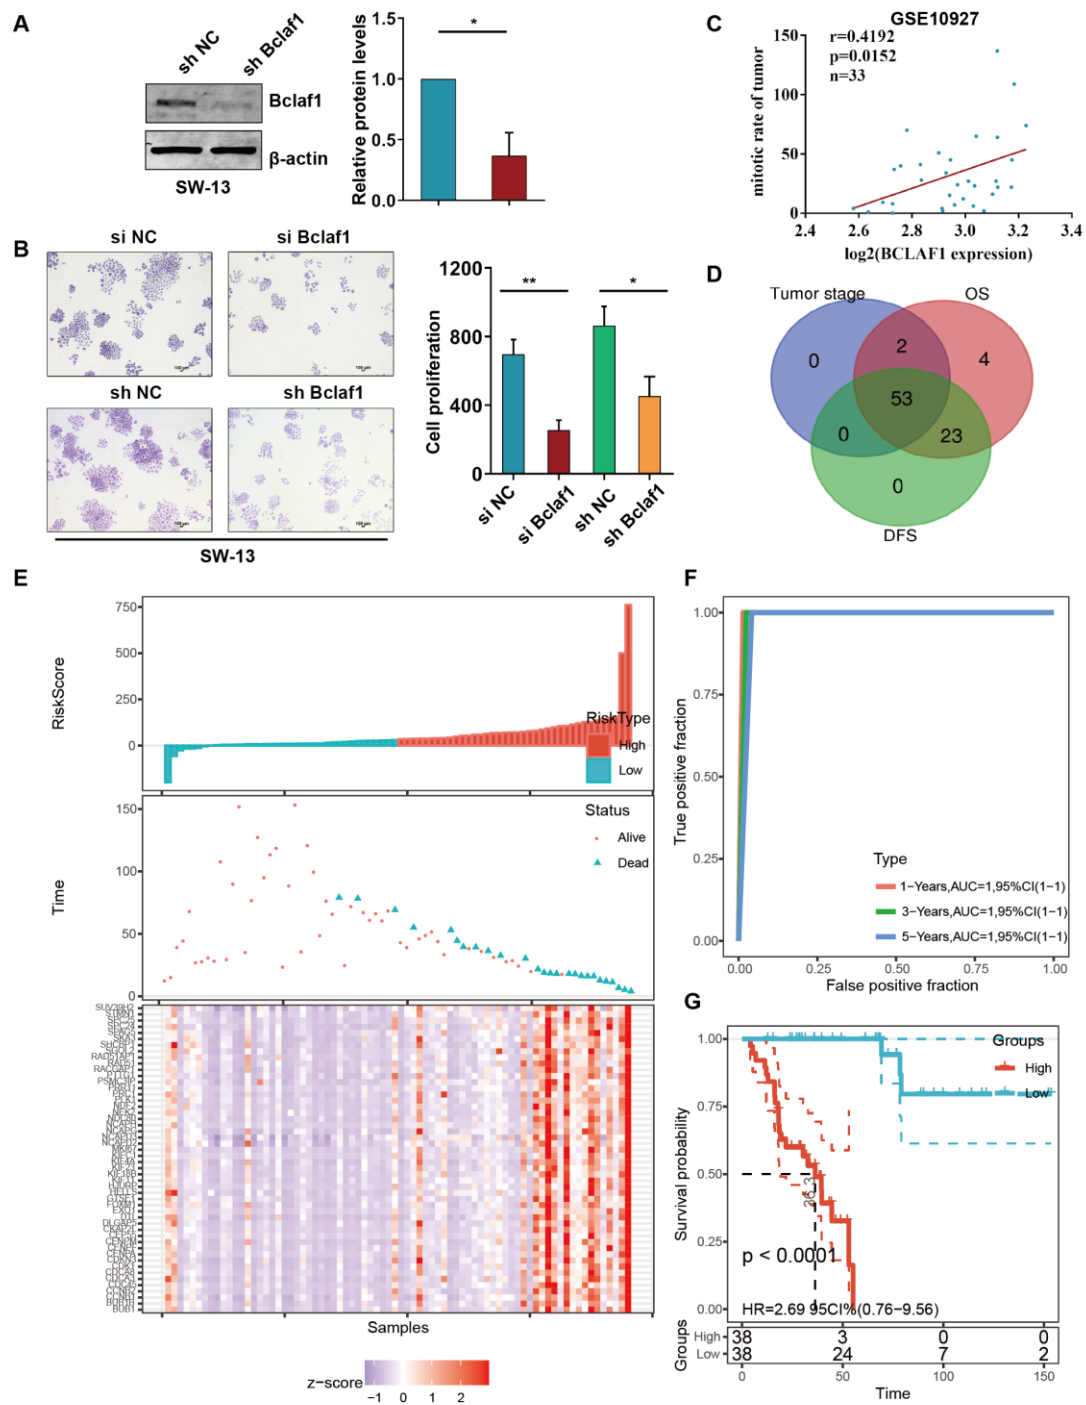

[316599]Figure S[2]

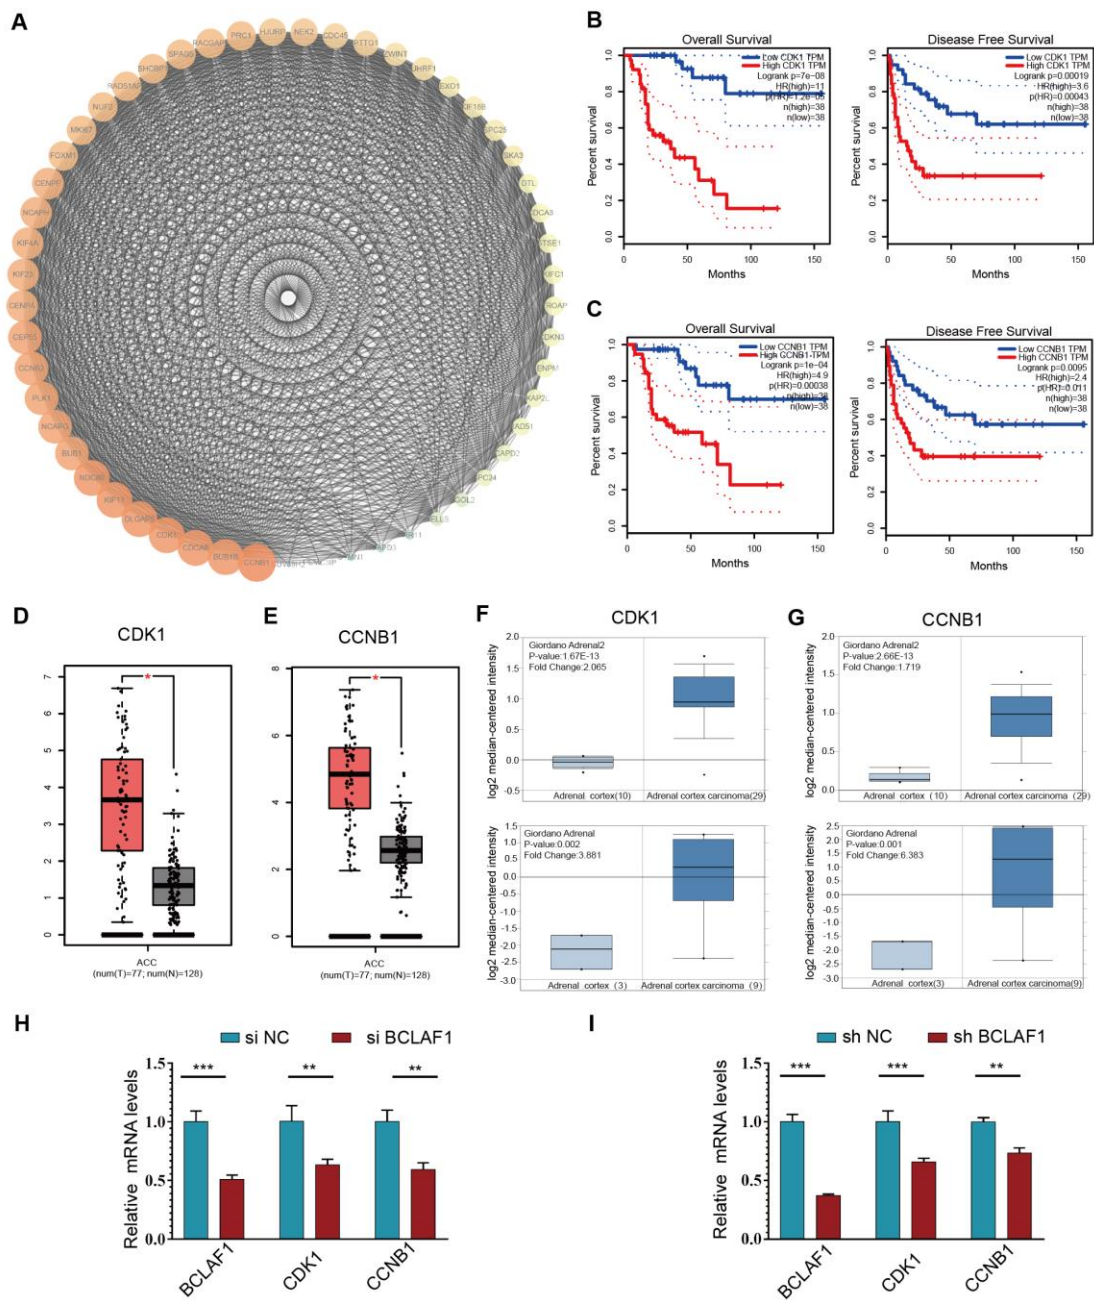

[316599]Figure S[3]

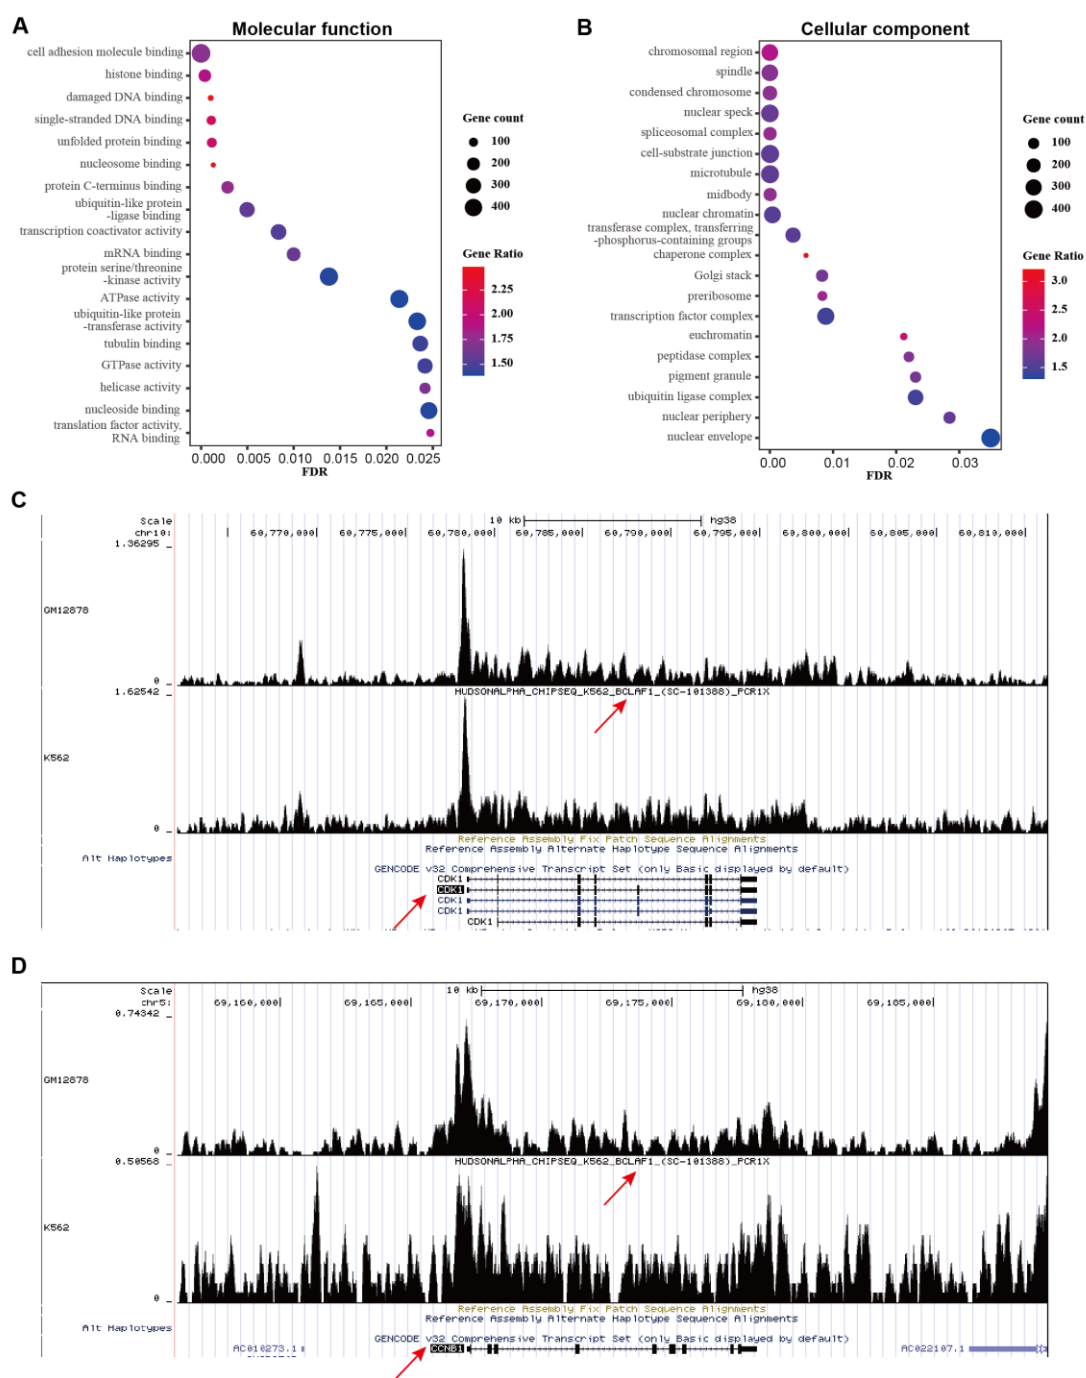

[316599]Figure S[4]

## Supplementary figure legends

**Figure S1.** A Differential analysis between adrenal cortex carcinoma and normal adrenal cortex performed through an analysis of the Oncomine database. B, C Kaplan-Meier plots showing OS rates (B) and DFS rates (C) for the high-BCLAF1 and low-BCLAF1 groups. P values were calculated using the log-rank test. D Volcano plots were created to illustrate the distribution of DEGs. The vertical line indicates  $|\log_2FC| = 1$ . E Clustering of 76 samples after excluding outliers (height > 25000). F Determination of the soft thresholding power ( $\beta=6$ ) for gene clustering. G Merging of clustered modules with height < 0.25. H Hierarchical clustering dendrograms of identified coexpressed genes in 14 modules. I The cell proliferation was determined after crystal violet staining by wide field microscopy.

**Figure S2.** A Bclaf1 was downregulated by stably integrated BCLAF1-shRNA expression construct. B The cell proliferation was determined by crystal violet staining after knockdown of Bclaf1. C Correlation between Bclaf1 expression and the tumour mitotic rate. D Venn diagram presenting the overlap between different types of clinical information. E Relationship between gene expression and patient survival status. The patients were graded into high-risk and low-risk groups based on their survival status and gene expression (upper panel). The patients' follow-up times are plotted in the middle panel, and the blue triangle indicates death. The expression of 53 genes is illustrated by the heatmap (lower panel). F ROC curve constructed to evaluate the survival status based on the risk score. Coloured curves described the ability to predict the outcome of the patient's death at 1, 3, and 5 years of follow-up. G Survival analysis of patients in the high-risk vs. low-risk groups.

**Figure S3.** A PPI network of 53 genes. The larger, darker nodes represent higher-degree

nodes. B, C Kaplan-Meier plots showing OS rates and DFS rates for the two core genes. D, E Box plots of (D) CDK1 and (E) CCNB1 based on the TCGA database and matched GTEx normal-tissue database. F, G Differential analysis between adrenal cortex carcinoma and normal adrenal cortex performed by Oncomine database analysis. H, I Downregulation of CDK1 and CCNB1 via BCLAF1 knockdown after cell transfection. The mRNA levels were assessed by RT-qPCR.  $**p < 0.01$ , and  $***p < 0.001$  vs. the control.

**Figure S4.** A, B Plot of the GO enrichment analysis. The molecular function (MF) and cellular component (CC) terms are illustrated. C, D ChIP-seq performed with the Cistrome Data Browser: a peak near a transcription start site (TSS) indicates that Bclaf1 has a binding signal at this locus.
